# Supplementary material for: The bromodomain protein BRD4 regulates the KEAP1/NRF2-dependent oxidative stress response
Source: PubMed Central journal article supplement — Cell Death Dis. 2014 Apr 24;5(4):e1195–. doi: 10.1038/cddis.2014.157 (PMC4001311; doi:10.1038/cddis.2014.157), 2014-04-24
Supplement: cddis2014157x1.pdf [file cddis2014157x1.pdf]

## Hussong\_Fig.S1

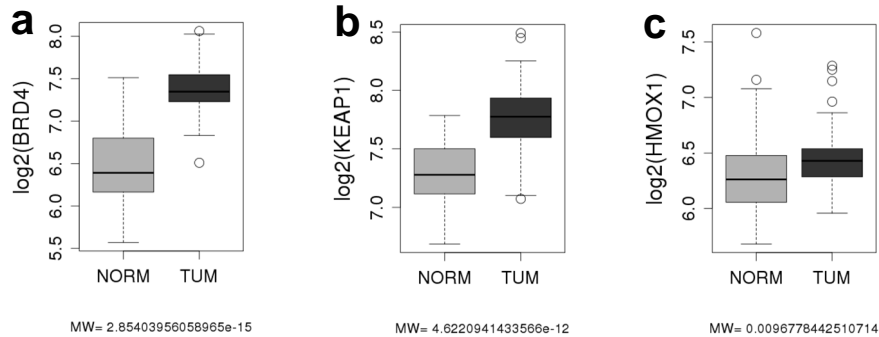

**Figure S1.** Gene expression of BRD4, KEAP1 and HMOX1 in prostate tumor and normal samples. Shown are box plots of the expression of **(a)** BRD4 (Mann-Whitney p-value:  $p < 2.9 \times 10^{-15}$ ), **(b)** KEAP1 (Mann-Whitney p-value:  $p < 4.7 \times 10^{-12}$ ) and **(c)** HMOX1 (Mann-Whitney p-value:  $p < 0.01$ ). Differential expressions were calculated based on values of 47 tumor and 48 normal samples.
