# Supplementary material for: The bromodomain protein BRD4 regulates the KEAP1/NRF2-dependent oxidative stress response
Source: PubMed Central journal article supplement — Cell Death Dis. 2014 Apr 24;5(4):e1195–. doi: 10.1038/cddis.2014.157 (PMC4001311; doi:10.1038/cddis.2014.157), 2014-04-24
Supplement: cddis2014157x2.pdf [file cddis2014157x2.pdf]

## Hussong\_Fig.S2

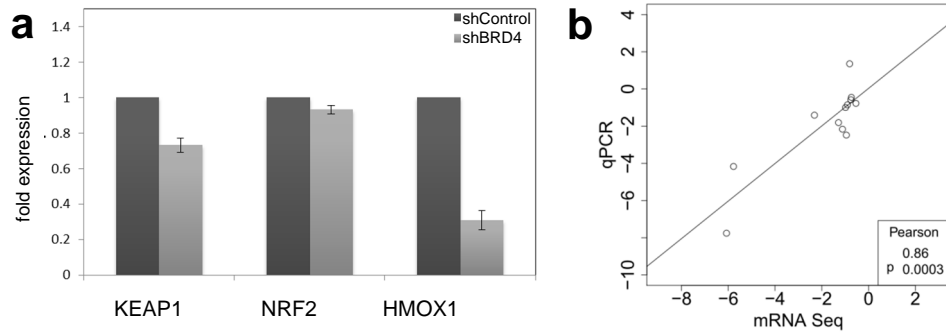

**Figure S2. (a)** qPCR validation of KEAP1, NRF2 and HMOX1 after BRD4 knock down.  $\beta$ -tubulin was used as reference gene in qPCR analyses. The results represent the averages of three independent experiments. **(b)** Spearman correlation of the mRNA-Seq data with qPCR validations of differentially expressed genes after Brd4 knock down.
