# Supplementary material for: The bromodomain protein BRD4 regulates the KEAP1/NRF2-dependent oxidative stress response
Source: PubMed Central journal article supplement — Cell Death Dis. 2014 Apr 24;5(4):e1195–. doi: 10.1038/cddis.2014.157 (PMC4001311; doi:10.1038/cddis.2014.157), 2014-04-24
Supplement: cddis2014157x3.pdf [file cddis2014157x3.pdf]

## Hussong\_Fig.S3

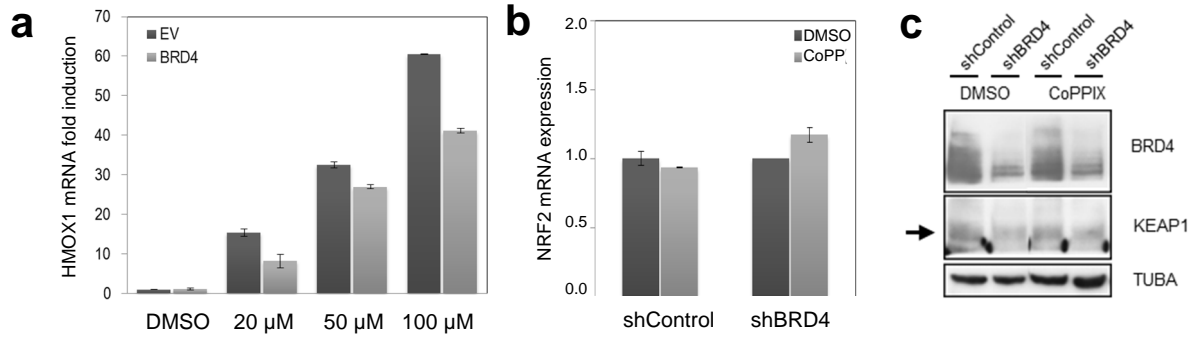

**Figure S3. (a)** BRD4 overexpression during CoPP induction decreases the HMOX1 levels. HEK293T cells were transfected with either the BRD4 overexpressing plasmid or the empty vector control and stimulated with 20, 50 and 100 μM of CoPP for 14 h. The expression of HMOX1 was measured using qPCRs. As reference gene  $\beta$ -tubulin was used. **(b)** Quantitative PCR analyses of NRF2 before and after CoPP treatment. NRF2 mRNA level were measured after stimulation with 50 μM CoPP in BRD4 knock down or control cells. The expression values were normalized to the corresponding DMSO control and as reference gene tubulin was used. **(c)** BRD4 and KEAP1 protein levels were measured following treatment with 20 μM CoPP for 14 h in BRD4 knock down cells (shBRD4) or control cells (shControl). As loading control  $\alpha$ -tubulin was used.
